# Supplementary material
Source: Research Square preprint supplement (doi:10.21203/rs.3.rs-10084994/v1)
Supplement: Supplementary file 1 [file 40fa531646929fbe11be1c5d.docx]

**Supporting Information**

**Wood quality and material integrity of wildfire-exposed Cryptomeria japonica evaluated by mechanical grading and multi-scale characterization**

Yuta Nakayasua,*, Kosuke Yamaguchib,**, Kayoko Kobayashic, Yuka Nakagawad,e, Keisho Ria,f,Keito Mineod,e, Takaaki Tomaia, Hironori Taniuchib, Yoshiya Tougeg, h,***

a Frontier Research Institute for Interdisciplinary Sciences, Tohoku University, 6-3 Aoba, Aza, Aramaki, Aoba-ku, Sendai, Miyagi 980-8578, Japan.

b Iwate Prefectural Forestry Technology Center, 560-11 Kemuyama, Dai-3-chiwari

Yahaba Town, Shiwa-gun, Iwate 028-3623, Japan

c Division of Forest and Biomaterials Science, Graduate School of Agriculture, Kyoto University, Sakyo-ku, Kyoto 606-8502, Japan

d Institute for Chemical Research, Kyoto University, Gokasho, Uji, Kyoto, 611-0011, Japan

e Biomass Product Tree Industry-Academia Collaborative Research Laboratory, Kyoto University, Gokasho, Uji, Kyoto 611-0011, Japan

f School of Engineering, Tohoku University, 6-6 Aoba, Aza, Aramaki, Aoba-ku, Sendai, Miyagi 980-8579, Japan.

g Institute for Advanced Academic Research, Chiba University, 1-33 Yayoi-cho, Inage-ku, Chiba, Chiba 263-8522, Japan

h Disaster Prevention Research Institute, Kyoto University, Gokasho, Uji, Kyoto, 611-0011, Japan

*Correspondence to: Frontier Research Institute for Interdisciplinary Sciences, Tohoku University, 6-3 Aoba, Aza, Aramaki, Aoba-ku, Sendai, Miyagi 980-8578, Japan. E-mail addresses: [nakayasu@tohoku.ac.jp](mailto:nakayasu@tohoku.ac.jp) (Y. Nakayasu)

** Correspondence to: Iwate Prefectural Forestry Technology Center, 560-11 Kemuyama, Dai-3-chiwari Yahaba Town, Shiwa-gun, Iwate 028-3623, Japan. E-mail addresses: [kousuke-yamaguchi@pref.iwate.jp](mailto:kousuke-yamaguchi@pref.iwate.jp) (K. Yamaguchi)

*** Correspondence to: Institute for Advanced Academic Research, Chiba University, 1-33 Yayoi-cho, Inage-ku, Chiba, Chiba 263-8522, Japan. E-mail addresses: [touge@chiba-u.jp](mailto:touge@chiba-u.jp) (Y. Touge)


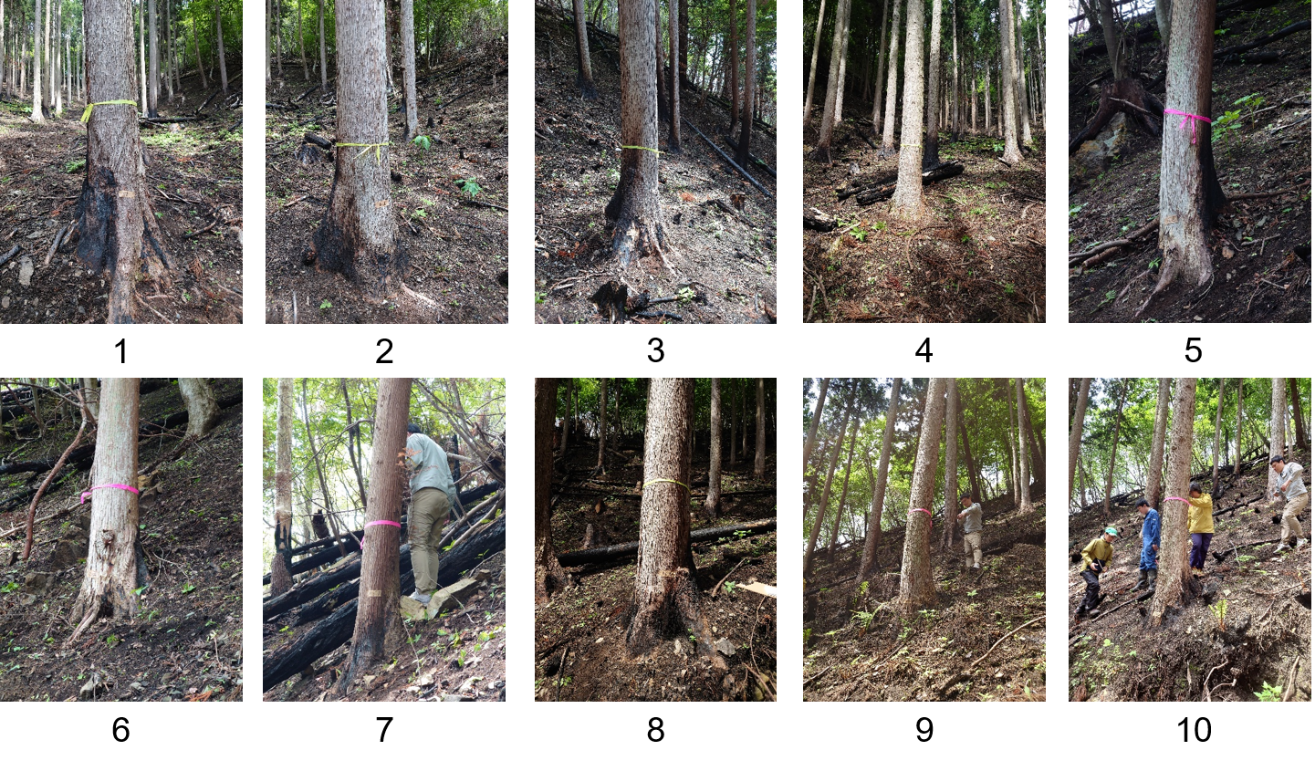


Fig. S1 Photographs of ten trees classified into low severity.


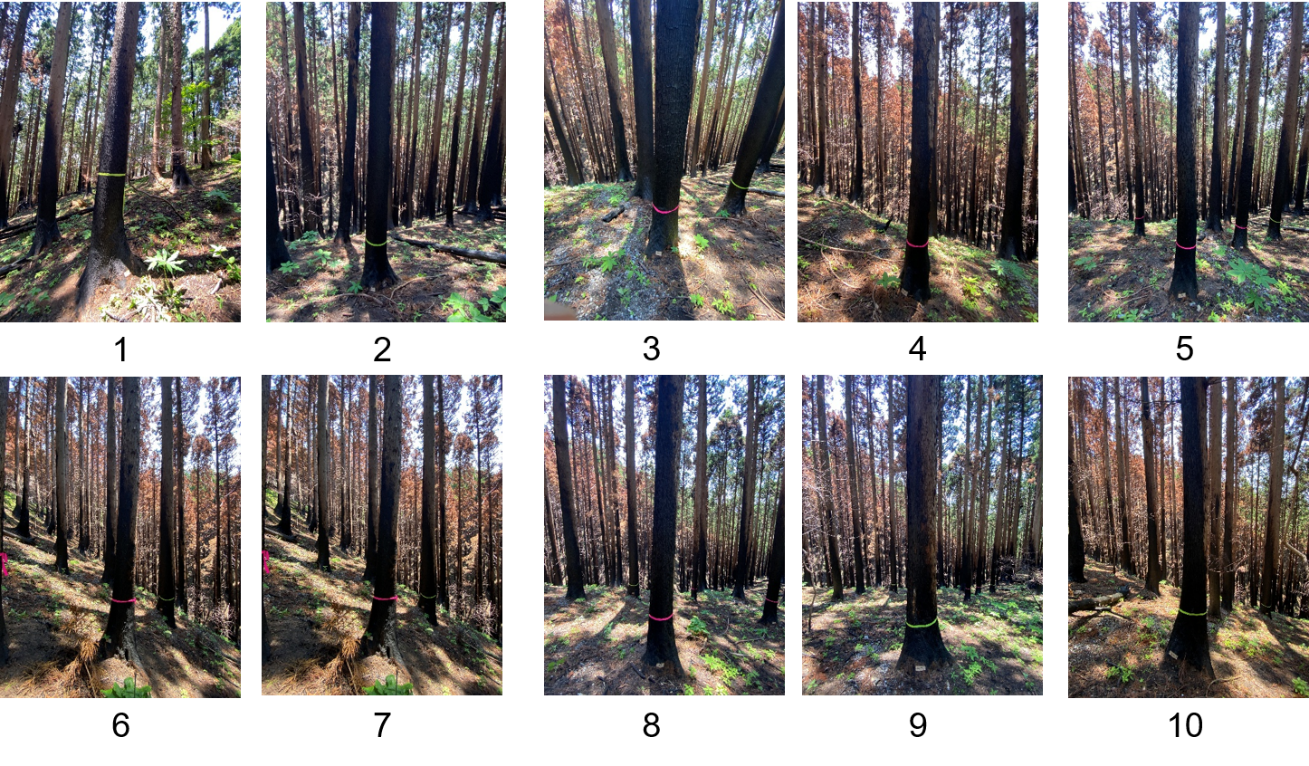


Fig. S2 Photographs of ten trees classified into moderate severity.


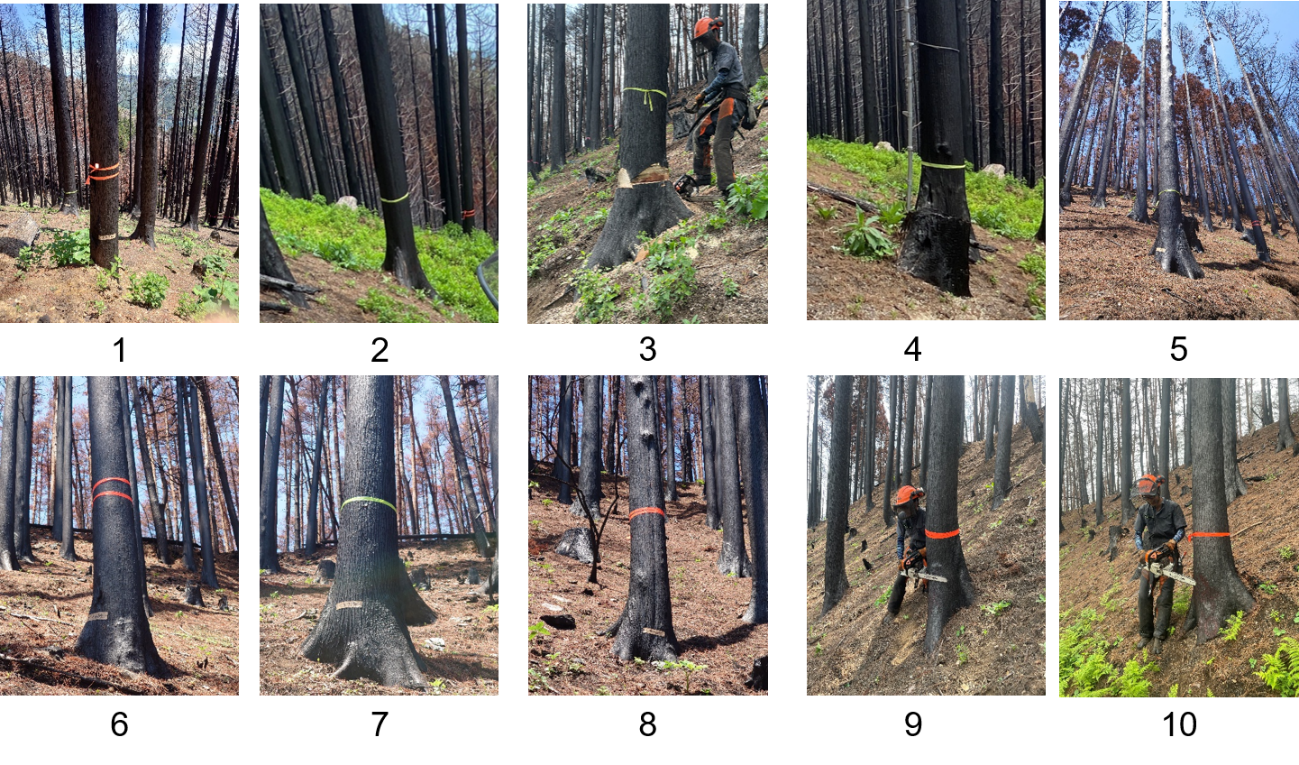
Fig. S3 Photographs of ten trees classified into severe severity.


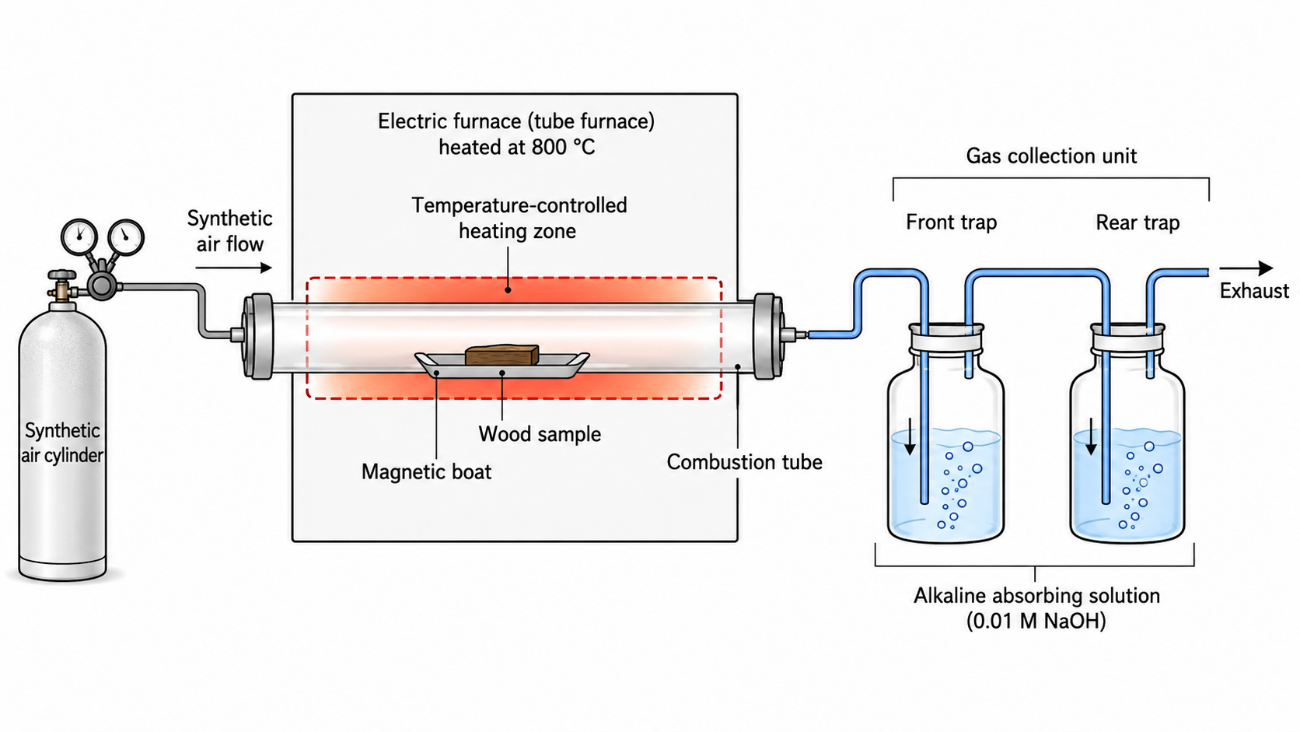


**Fig. S4** Schematic representation of the procedure used to determine the total chlorine concentration.

**Table S1**. Descriptive comparison between severely burned wood and control

| **Component** | **Severely burned mean ± SD (%)** | **Severely burned range (%)** | **Control mean ± SD (%)** | **Control range (%)** | **Mean difference (burned − control)** |
| --- | --- | --- | --- | --- | --- |
| Glucose | 43.75 ± 2.63 | 41–46 | 45.00 ± 1.41 | 44–46 | -1.25 |
| Xylose | 4.50 ± 0.58 | 4–5 | 5.00 ± 0.00 | 5–5 | -0.50 |
| Galactose | 0.25 ± 0.50 | 0–1 | 0.00 ± 0.00 | 0–0 | +0.25 |
| Arabinose | 1.00 ± 0.00 | 1–1 | 1.00 ± 0.00 | 1–1 | +0.00 |
| Mannose | 6.50 ± 0.58 | 6–7 | 7.00 ± 1.41 | 6–8 | -0.50 |
| Lignin | 39.50 ± 1.91 | 37–41 | 36.00 ± 1.41 | 35–37 | +3.50 |
| Total | 95.50 ± 2.52 | 93–99 | 94.50 ± 0.71 | 94–95 | +1.00 |

*Note: Values are descriptive statistics only. Because each ring position is represented by a single value and the sample size is small, the manuscript should avoid the expression “no statistically significant difference” unless additional replicate-based statistical tests are performed.*


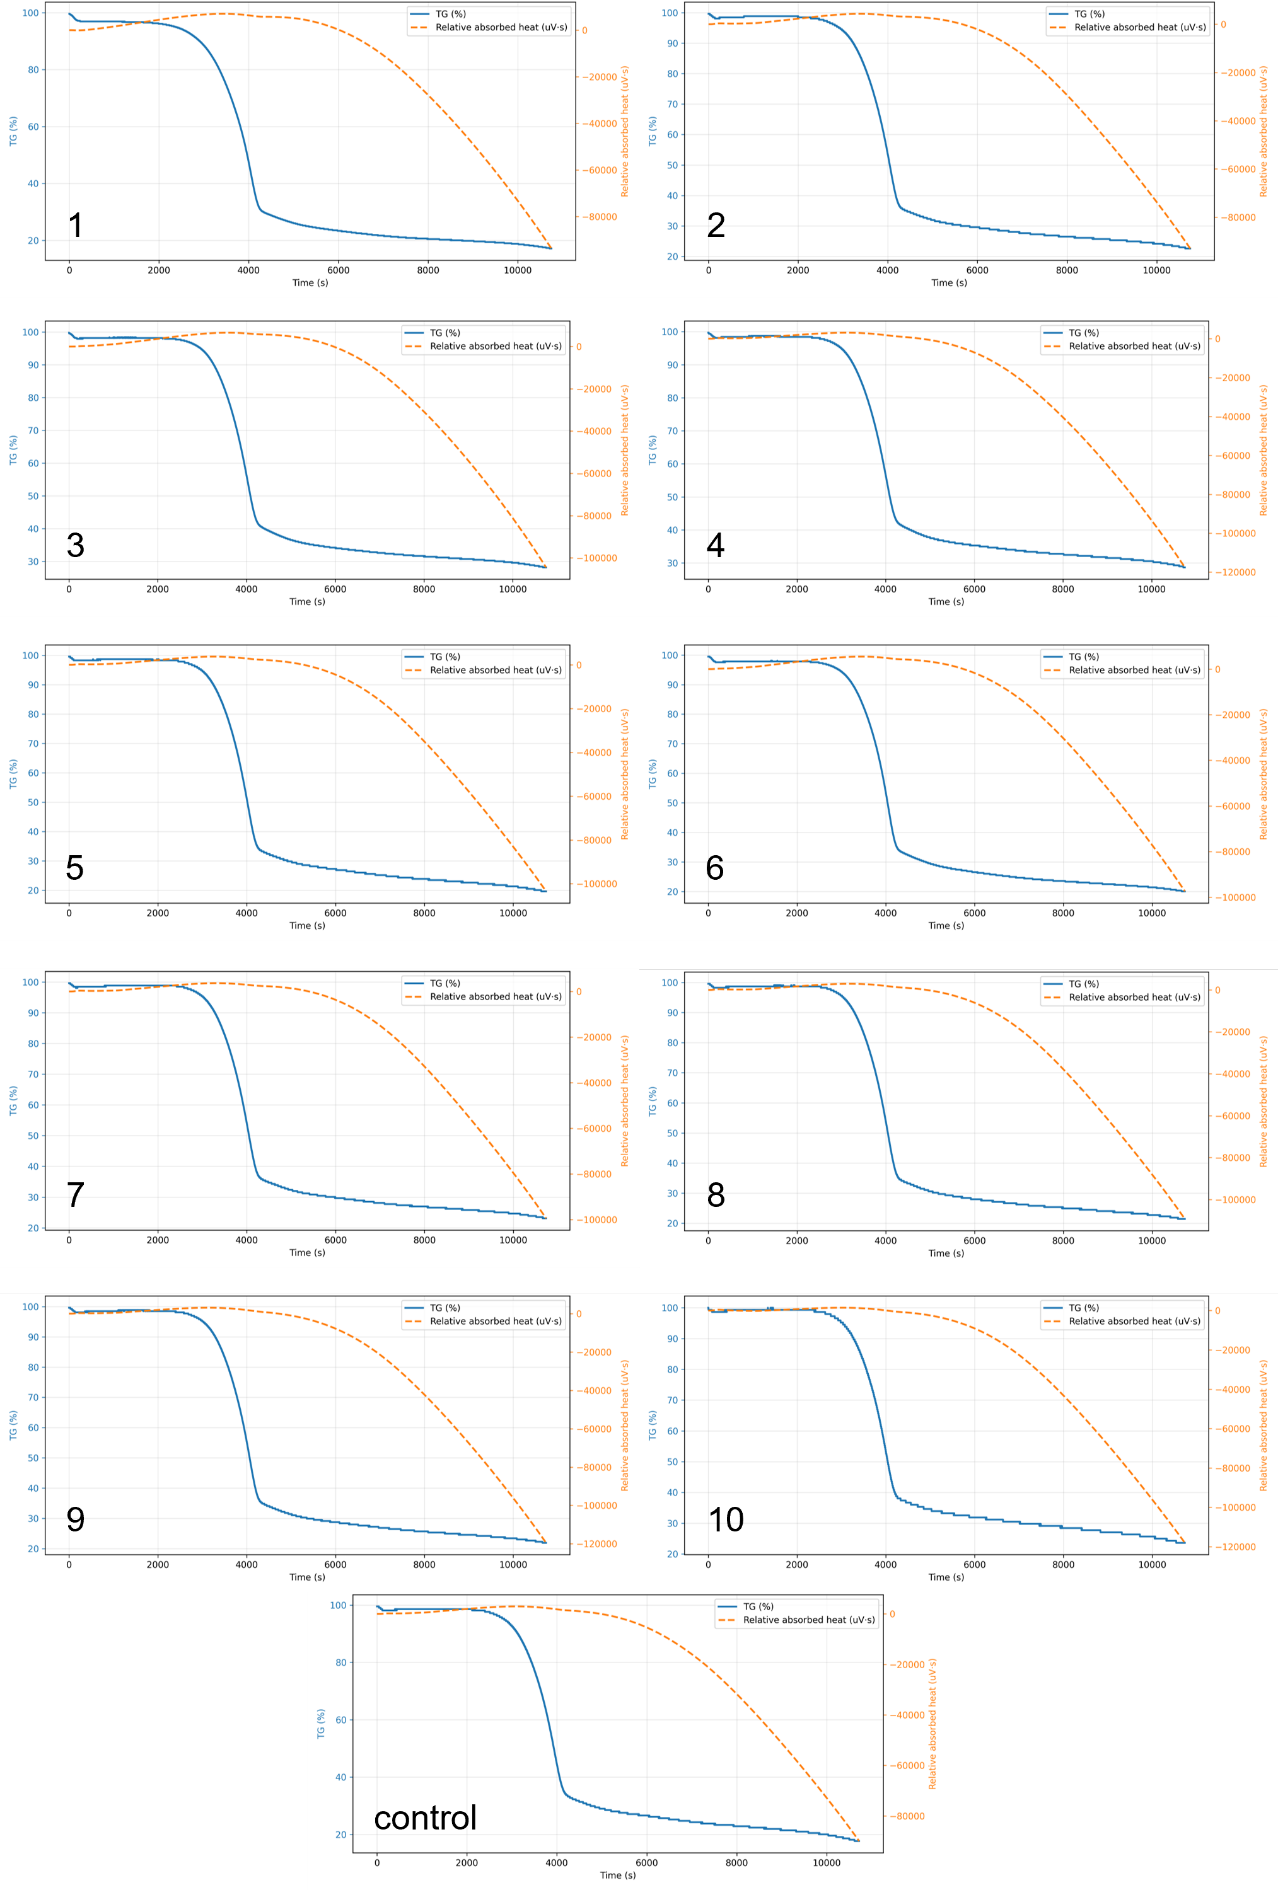


**Fig. S5**. Thermogravimetric analysis of the outer annual rings of severely burned wood.
